# Supplementary material
Source: PubMed Central journal article supplement (PMC6612314)
Supplement: NIHMS1521760-supplement-1.pdf [file NIHMS1521760-supplement-1.pdf]

| <i>Epitope</i>  | <i>Clone</i>           | <i>Manufacturer</i>    |          |
|-----------------|------------------------|------------------------|----------|
| CD117           | 2B8                    | eBioscience            | 2        |
| CD11b           | M1/70                  | eBioscience, Biolegend | 3        |
| CD19            | eBio1D3                | eBioscience, Biolegend | 4        |
| CD3e            | 145-2C11,<br>eBio500A2 | eBioscience, Biolegend | 5<br>6   |
| CD4             | GK1.5                  | eBioscience, Biolegend | 7        |
| CD45.1          | A20                    | eBioscience, Biolegend | 8        |
| CD45.2          | 104                    | eBioscience, Biolegend | 9        |
| CD45R (B220)    | RA3-6B2                | eBioscience, Biolegend | 10       |
| CD8a            | 53-6.7                 | eBioscience, Biolegend | 11       |
| Ly6C            | AL-21                  | Biolegend              | 12       |
| Ly6G            | 1A8                    | Biolegend              | 13       |
| NK1.1           | PK136                  | eBioscience, Biolegend | 14<br>15 |
| Sca-1 (Ly-6A/E) | D7                     | eBioscience, Biolegend | 16       |
| Ter119          | TER-119                | eBioscience            | 17       |
| CD44            | IM7                    | eBioscience, Biolegend | 18       |
| CD25            | PC61.5                 | eBioscience, Biolegend | 19       |
| F4/80           | BM8                    | eBioscience, Biolegend | 20       |

**Table E1.** Antibodies used in flow cytometry experiments.

| <i><b>Primer</b></i> | <i><b>PrimerBank ID</b></i> | <i><b>Sequence</b></i>  |
|----------------------|-----------------------------|-------------------------|
| cxcl10-for           | 10946576a1                  | CCAAGTGCTGCCGTCATTTTC   |
| cxcl10-rev           | 10946576a1                  | GGCTCGCAGGGATGATTTCAA   |
| ifi44-for            | 19527086a1                  | AACTGACTGCTCGCAATAATGT  |
| ifi44-rev            | 19527086a1                  | GTAACACAGCAATGCCTCTTGT  |
| hprt-for             | 7305155a1                   | TCAGTCAACGGGGGACATAAA   |
| hprt-rev             | 7305155a1                   | GGGGCTGTACTGCTTAACCAG   |
| rpl13a-for           | 334688867c2                 | AGCCTACCAGAAAGTTTGCTTAC |
| rpl13a-rev           | 334688867c2                 | GCTTCTTCTTCCGATAGTGCATC |
| eef2-for             | 237858599c1                 | CCGACTCCCTTGTGTGCAA     |
| eef2-rev             | 237858599c1                 | AGTTCAGGTCGTTCTCAGAGAG  |

**Table E2.** Primers used in qRT-PCR experiments.

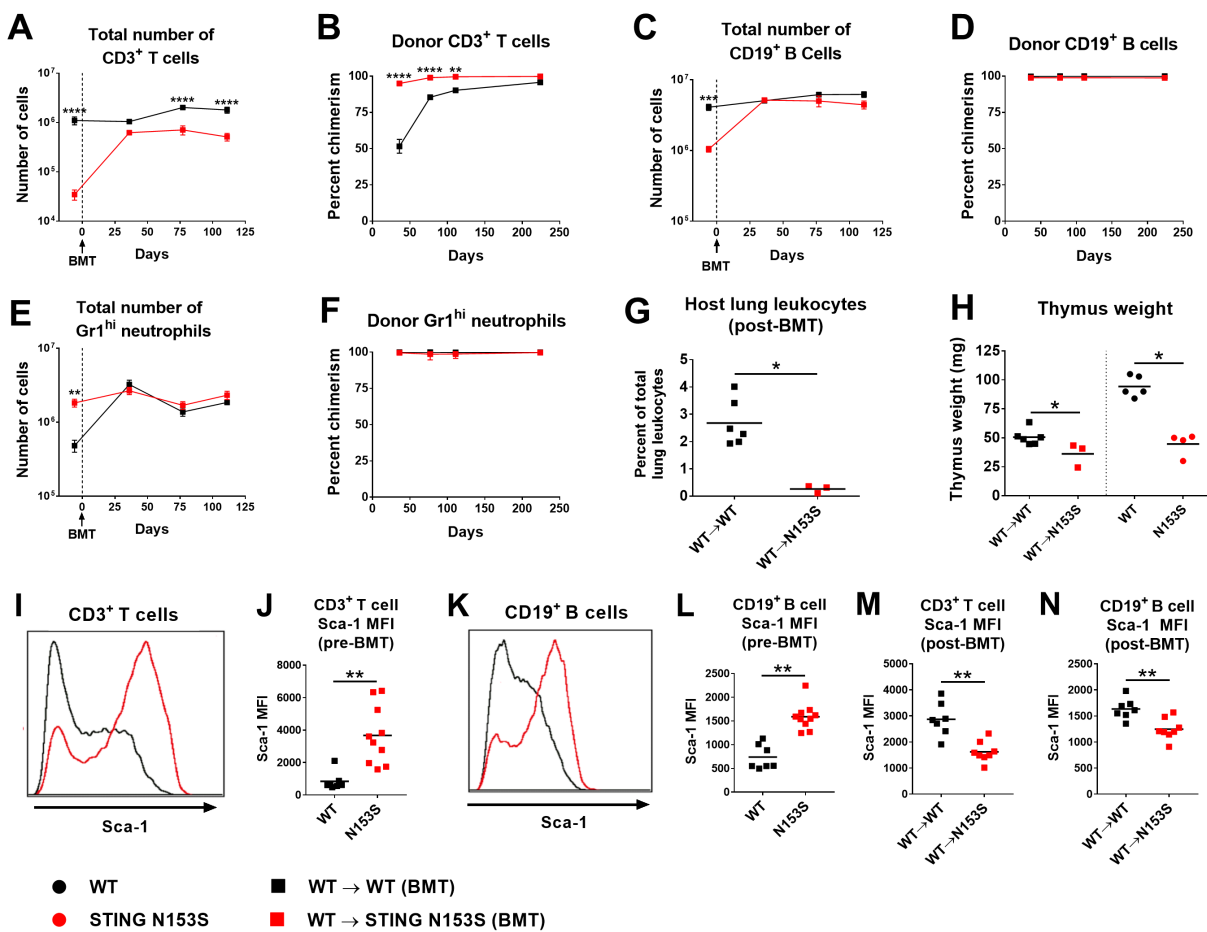

Supplemental Figure E1

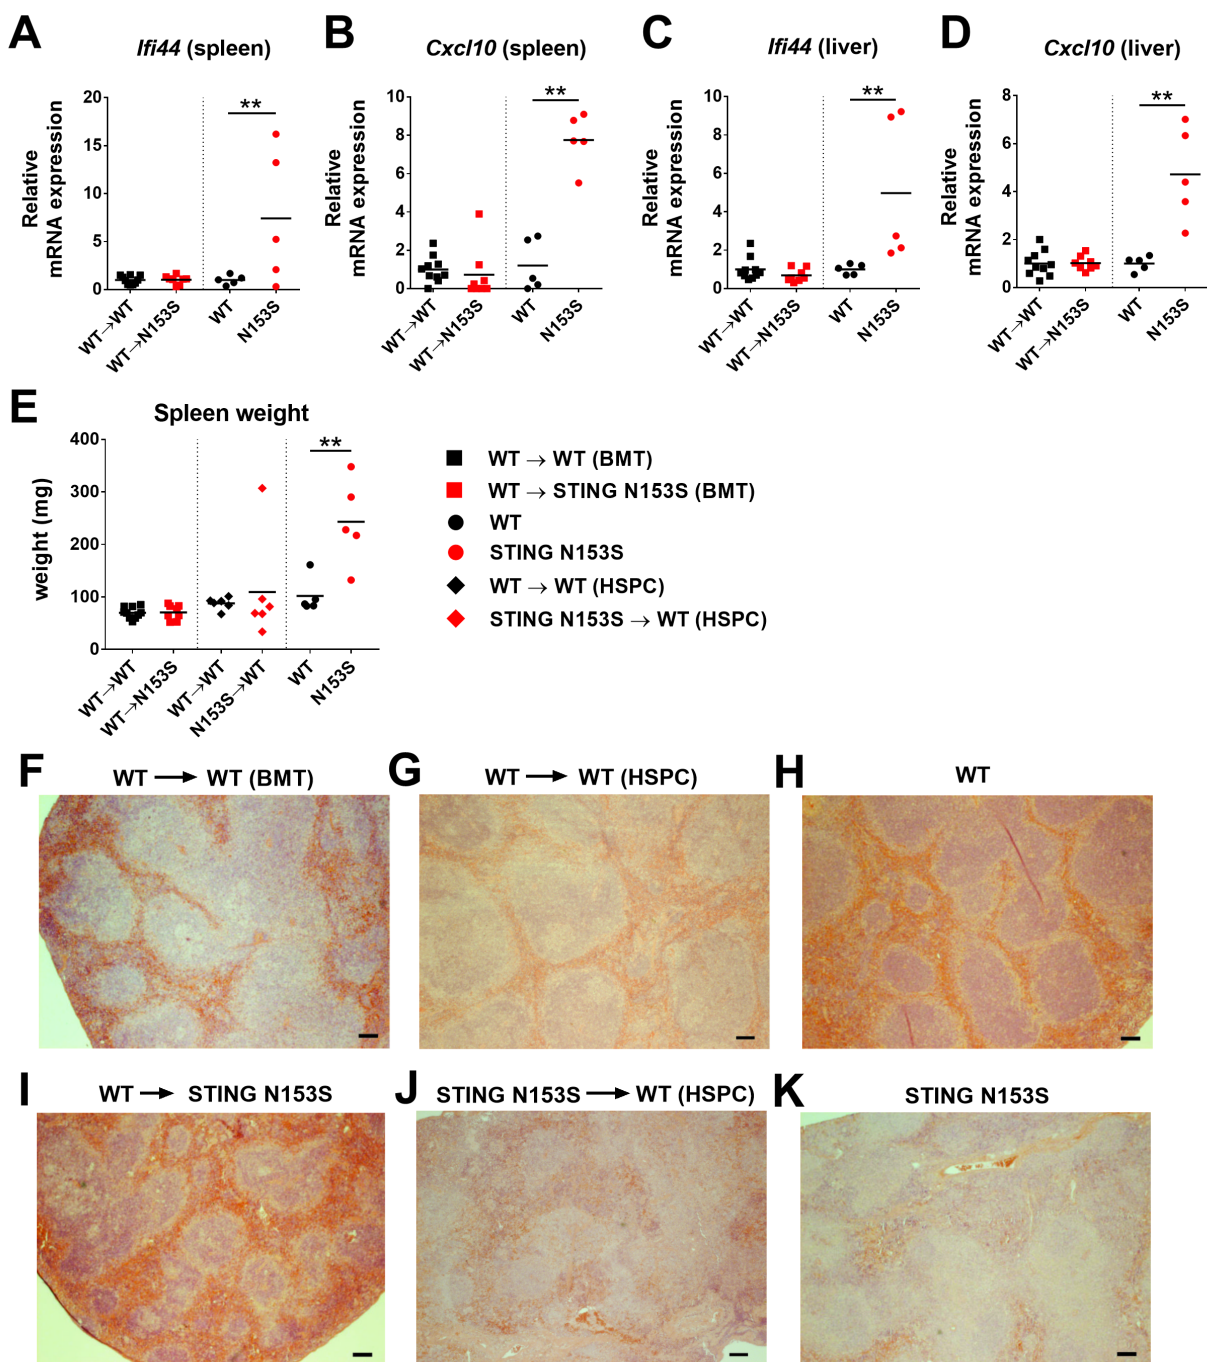

Supplemental Figure E2

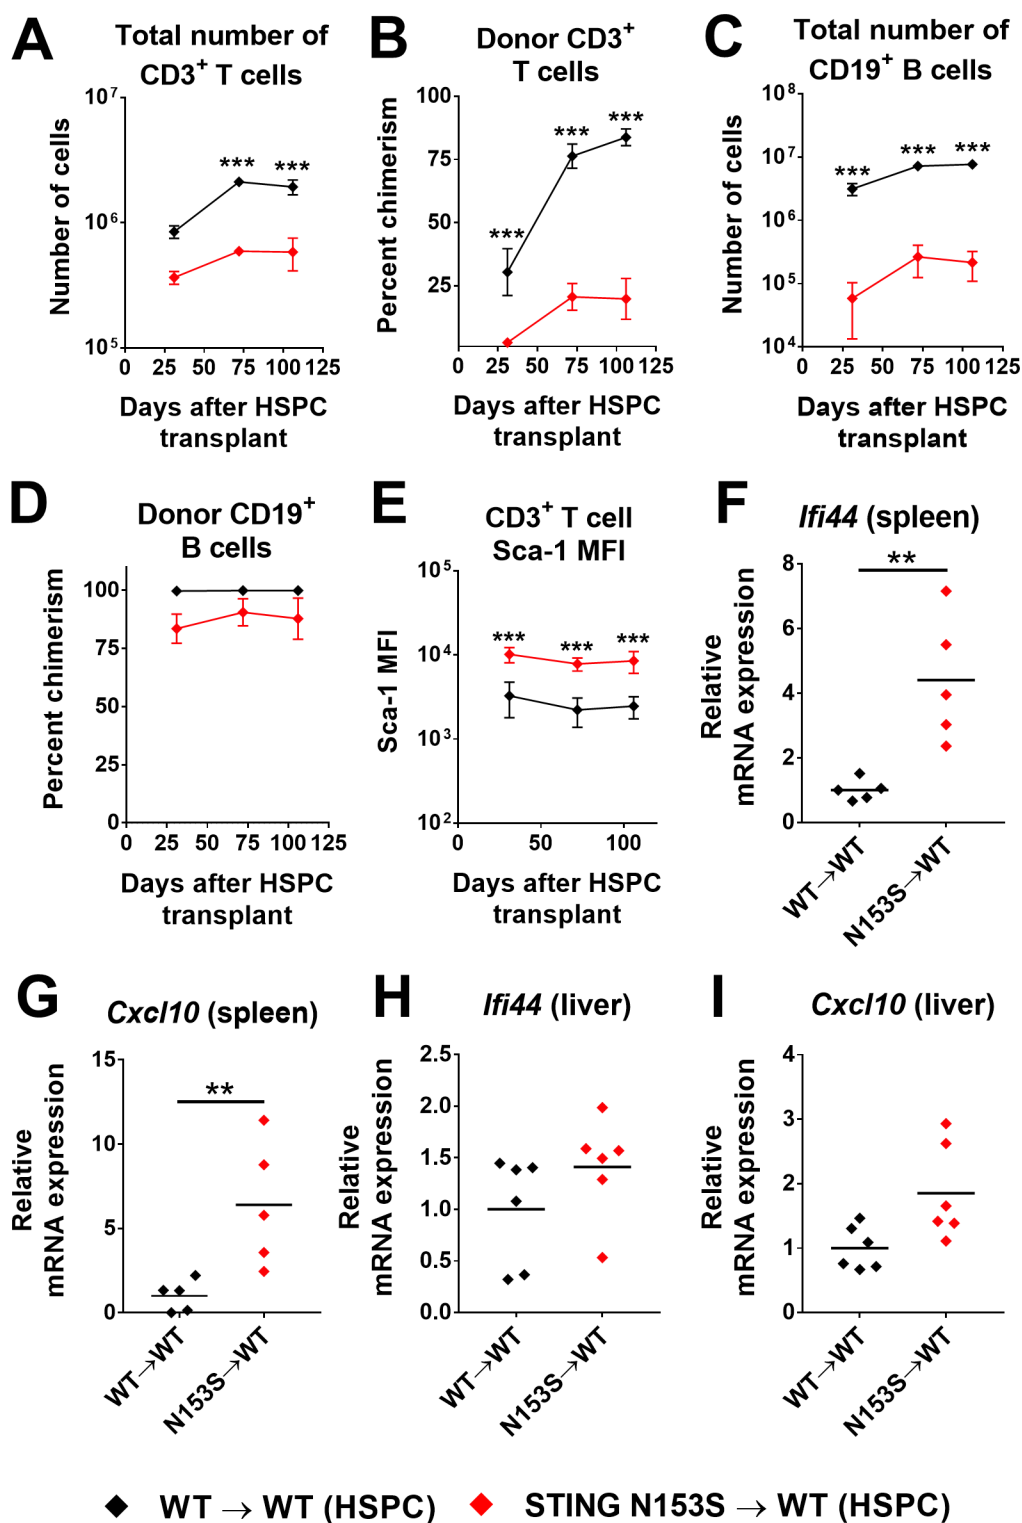

Supplemental Figure E3

**A**

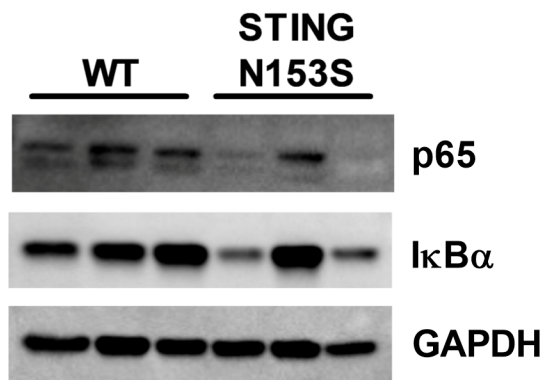

**Supplemental Figure E4**

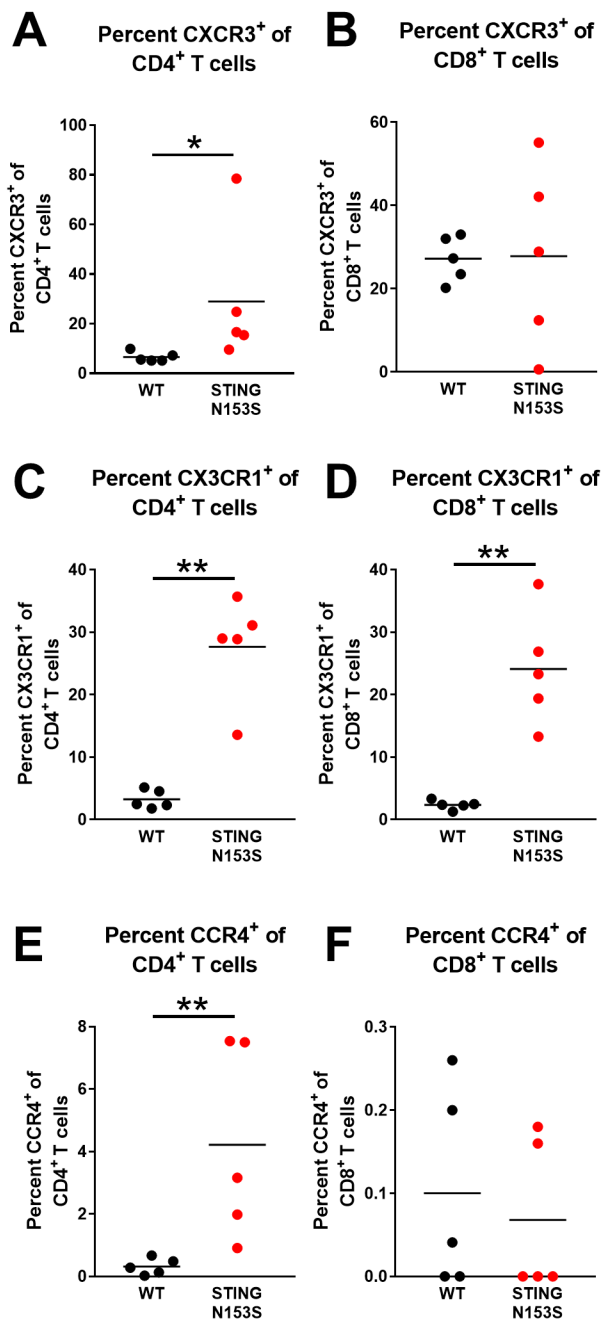

**Supplemental Figure E5**

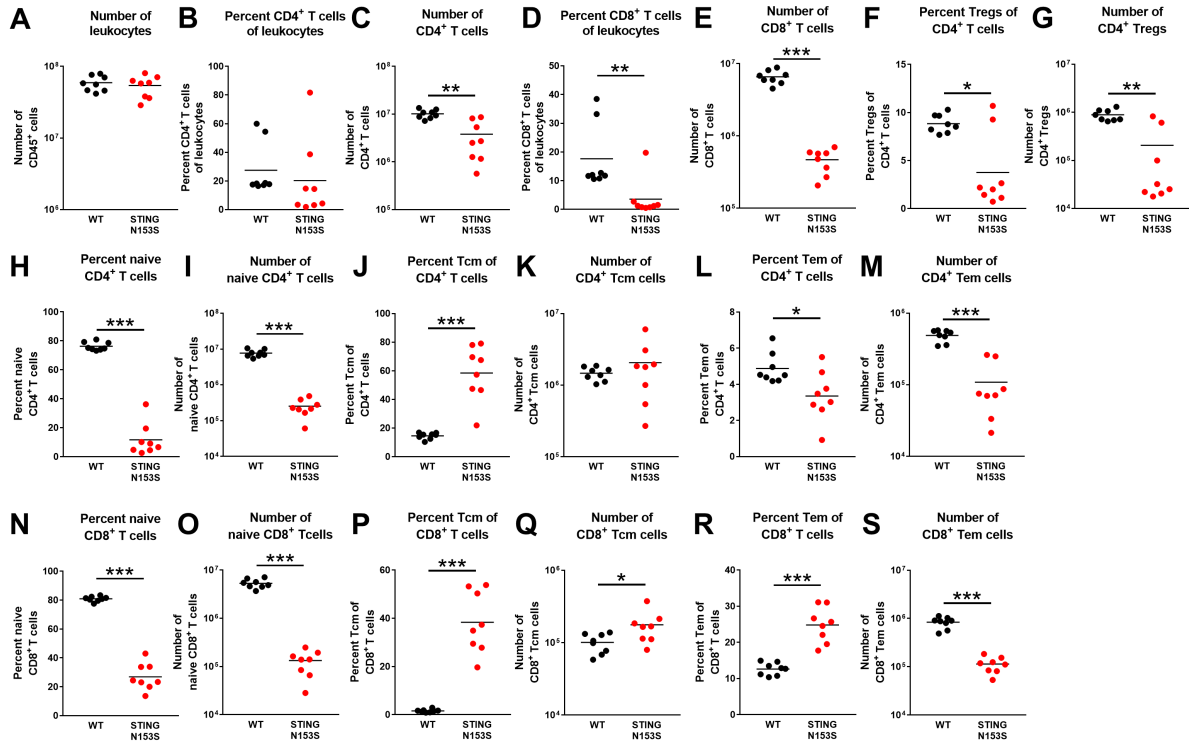

Supplemental Figure E6

**ONLINE REPOSITORY**

**STING-associated lung disease in mice relies primarily on T cells but not type I interferon**

**Authors:** Hella Luksch PhD<sup>a†</sup>, W. Alexander Stinson BS<sup>d†</sup>, Derek J. Platt BS<sup>e</sup>, Wei Qian PhD<sup>c</sup>, Gowri Kalugotla BS<sup>c</sup>, Cathrine A. Miner BA<sup>c</sup>, Brock G. Bennion BS<sup>d</sup>, Alexander Gerbaulet PhD<sup>b</sup>, Angela Rösen-Wolff MD PhD<sup>a\*</sup>, Jonathan J. Miner MD PhD<sup>c,d,e\*</sup>

**Affiliations:** Department of Pediatrics,<sup>a</sup> University Hospital Carl Gustav Carus, Institute for Immunology,<sup>b</sup> Technische Universität Dresden, Fetscherstraße 74, 01307, Dresden, Germany and Departments of Medicine,<sup>c</sup> Pathology and Immunology,<sup>d</sup> and Molecular Microbiology,<sup>e</sup> Washington University School of Medicine, Saint Louis, MO, USA 63110

<sup>†</sup>These authors contributed equally to this work.

\*Correspondence should be addressed to:

Jonathan J. Miner, M.D., Ph.D., Departments of Medicine, Molecular Microbiology, and Pathology and Immunology, Washington University School of Medicine, 660 South Euclid Ave. Box 8045, Saint Louis, MO 63110, USA. jonathan.miner@wustl.edu (314) 747-4439

OR

Angela Rösen-Wolff, M.D., Department of Pediatrics, University Hospital Carl Gustav Carus, Technische Universität Dresden, Fetscherstraße 74, 01307, Dresden, Germany. Angela.Roesen-Wolff@uniklinikum-dresden.de +49(0)351-458-6870

## FIGURE LEGENDS

**FIG E1. Mixed chimerism after WT bone marrow transplantation (BMT).** 9-13 week-old adult WT and STING N153S mice were lethally irradiated and followed by transplantation of WT bone marrow. **A-F**, Peripheral blood was longitudinally analyzed for total numbers of CD3<sup>+</sup> T cells (A), donor CD3<sup>+</sup> T cells (B), total number of CD19<sup>+</sup> T cells (C), donor CD19<sup>+</sup> B cells (D), total number of CD11b<sup>+</sup> Gr-1<sup>hi</sup> neutrophils (E) and donor neutrophils. Data in (A-F) represent the mean  $\pm$  SEM of  $n = 6-10$  samples. **G**, Total number of CD45.2<sup>+</sup> leukocytes in the lung of WT and STING N153S recipient mice as quantitated by flow cytometry 224 days after transplantation. **H**, Thymus weight of transplanted WT and STING N153S mice as well as age-matched non-transplanted WT and STING N153S control animals. **I**, Representative histogram showing Sca-1 expression on CD3<sup>+</sup> splenocytes of non-transplanted WT and STING N153S mice. **J**, MFI of Sca-1 expression on CD3<sup>+</sup> T cells before BMT. **K**, Representative histogram showing Sca-1 expression on CD3<sup>+</sup> splenocytes of non-transplanted WT and STING N153S mice. **L**, MFI of Sca-1 expression on CD19<sup>+</sup> B cells before BMT. **M**, MFI of Sca-1 expression on CD3<sup>+</sup> T cells after BMT. **N**, MFI of Sca-1 expression on CD19<sup>+</sup> B cells after BMT. with  $n = 3 - 6$  mice per group. Data in (A-F) were analyzed by 2-way ANOVA. \*\*,  $P < 0.01$ ; \*\*\*,  $P < 0.001$ ; \*\*\*\*,  $P < 0.0001$ . Data in (G-N) were analyzed by Mann-Whitney test. \*,  $P < 0.05$ ; \*\*,  $P < 0.01$ .

**FIG E2. WT bone marrow transplantation (BMT) reduces ISG expression and improves splenic architecture in STING N153S mice.** **A-D**, ISG expression levels in spleens and livers of indicated groups of mice were assessed by qRT-PCR and reported as the fold change relative to the average of 3 housekeeping genes (*hprt1*, *rpl13a*, and *ef2*). Data represent the mean of  $n = 5-10$  tissues per group. Results were analyzed by Mann-Whitney test. \*,  $P < 0.05$ ; \*\*,  $P < 0.01$ . **E**, Weights of spleen from irradiated WT and STING N153S recipients of WT bone marrow, WT recipients of either STING N153S or WT HSPCs and WT and STING N153S non-irradiated control animals. **F-K**, Representative images of

50 H&E-stained spleen sections of indicated genotypes. Scale bar = 200  $\mu$ m. Data represent the mean of  $n = 5$ -  
51 10 mice.

52 **FIG E3. STING N153S HSPC transplantation into WT mice causes ISG upregulation.** Flow  
53 cytometric characterization of PBMCs and tissue expression of ISGs in WT mice transplanted with WT and  
54 STING N153S HSPCs. **A-E**, Peripheral blood was longitudinally examined for total numbers of CD3<sup>+</sup> T  
55 cells (A), donor CD3<sup>+</sup> T cells (B), total number of CD19<sup>+</sup> B cells (C), donor CD19<sup>+</sup> B cells (D), and Sca-1  
56 MFI on CD3<sup>+</sup> T cells (E). Data in (A-E) represent mean  $\pm$  SEM of two independent experiments and were  
57 analyzed by two-way ANOVA test.  $n = 6$  mice per group. \*\*\*,  $P < 0.001$ . **F-I**, ISG expression levels in  
58 spleens and livers of indicated groups of mice were assessed by qRT-PCR and reported as the fold change  
59 relative to the average of 3 housekeeping genes (*hprt1*, *rpl13a*, and *eef2*). Results were analyzed by Mann-  
60 Whitney test.  $n = 6$  per group. \*\*,  $P < 0.01$ .

61

62 **FIG E4. NF- $\kappa$ B activation in the lungs of WT and STING N153S mice.** Western blot analysis from WT  
63 and STING N153S lung homogenates taken from  $n = 3$  mice per genotype for p65, I $\kappa$ B $\alpha$ , and housekeeping  
64 control GAPDH protein expression in lung homogenate from age-matched 13-17 week-old WT and STING  
65 N153S mice. Results are representative of 7 biological replicates analyzed in 2 independent experiments.

66

67 **FIG E5. Chemokine receptor expression on CD4<sup>+</sup> and CD8<sup>+</sup> splenic T cells** WT and STING N153S  
68 spleens were harvested for flow cytometric characterization of chemokine receptors on CD4<sup>+</sup> and CD8<sup>+</sup> T  
69 cells. **A-F**, Percent positivity of CXCR3 (A,B), CX3CR1 (C,D), and CCR4 (E,F) on CD4<sup>+</sup> and CD8<sup>+</sup> splenic  
70 T cells. Data in (A-F) represent mean of two independent experiments and were analyzed by Mann-Whitney  
71 test.  $n = 5$  mice per group. \*,  $P < 0.05$ ; \*\*,  $P < 0.01$ .

72

**FIG E6. T cell subset analysis in WT and STING N153S mice.** Splenocytes from 4-month-old WT and STING N153S mice were harvested and T cell subsets examined by flow cytometry. **A**, Total number of CD45<sup>+</sup> cells. **B-C**, Percent and number of CD4<sup>+</sup> T cells. **D-E**, Percent and number of CD8<sup>+</sup> T cells. **F-G**, Percent and number of CD25<sup>+</sup> Foxp3<sup>+</sup> CD4<sup>+</sup> T cells. **H-I**, Percent and number of CD44<sup>lo</sup> CD62L<sup>hi</sup> naïve CD4<sup>+</sup> T cells. **J-K**, Percent and number of CD44<sup>hi</sup> CD62L<sup>hi</sup> CD4<sup>+</sup> central memory T cells (Tcm). **L-M**, Percent and number of CD44<sup>hi</sup> CD62L<sup>lo</sup> CD4<sup>+</sup> effector memory T cells (Tem). **N-O**, Percent and number of CD44<sup>lo</sup> CD62L<sup>hi</sup> CD8<sup>+</sup> naïve T cells. **P-Q**, Percent and number of CD44<sup>hi</sup> CD62L<sup>hi</sup> CD8<sup>+</sup> Tcm cells. **R-S**, Percent and number of CD44<sup>hi</sup> CD62L<sup>lo</sup> CD8<sup>+</sup> Tem cells. Data in A-S represent the mean of  $n = 8$  mice per genotype from two independent experiments. Data were analyzed by Mann-Whitney test. \*,  $P < 0.05$ ; \*\*,  $P < 0.01$ .
